# Supplementary material for: Systematic Literature Review on Parental Perspectives of the Impact of COVID-19 Lockdown on Food-Related Behaviors
Source: Preprints.org preprint supplement (doi:10.20944/preprints202208.0102.v1), 2022-08-04
Supplement: Supplementary file 3 [file supplementary]

## Sheet: Additional characteristics
Study: First author, year, title, journal	Objective	Design/Method	Type: Qualitative/quntitative	Participants	Location	Results	Conclusions
Benson, T., et al. (2022). From the pandemic to the pan: the impact of COVID-19 on parental inclusion of children in cooking activities: a cross-continental survey. Public Health Nutrition, 25(1), 36–42. https://doi.org/10.1017/S1368980021001932	This study aimed to investigate the impact of COVID-19 on time spent cooking and parental inclusion of children in cooking. The secondary aim was to investigate differences between those who frequently included their children in cooking activities during the COVID-19 pandemic and those who included their children less, on a number of factors such as working from home, parents' diet quality and co…	Cross-continental survey with Wilcoxon-signed ranks, Independent t tests, Mann-Whitney U, χ2 and a binomial logistic regression used for assessment.	Quantitative	A convenience sample of parents over 18 years from the island of Ireland (n 180), Great Britain (n 312), the USA (n 120) and New Zealand (n 166).	The island of Ireland; Great Britain; USA; New Zealand	In three regions, parents' time spent cooking and inclusion of children in everyday cooking activities increased (P < 0·001). Country (OR = 3·6, 95 % CI 1·7, 7·6), education (OR = 1·6, 95 % CI 1·1, 2·4), cooking skills confidence (OR = 1·02, 95 % CI 1·009, 1·032) and a parental higher intake of vegetables (OR = 1·3, 95 % CI 1·1, 1·5) were significant predictors of a more frequent inclusion of chi…	While there a number of key benefits to including children in cooking for the children such as providing life skills and increases in diet quality, this study highlighted a higher intake of vegetables by parents who included children more frequently in cooking activities. With continued lockdowns due to COVID-19 and perhaps more flexibility in working from home in the future, including children i…
Carroll, N., et al. (2020). The impact of covid-19 on health behavior, stress, financial and food security among middle to high income canadian families with young children. Nutrients, 12(8), 1–14. https://doi.org/10.3390/nu12082352	The purpose of this study was to identify how health behaviors, level of stress, financial and food security have been impacted by the pandemic among Canadian families with young children.	Cross-sectional survey that included close and open-ended questions. Descriptive statistics were used to summarize the quantitative data and qualitative responses were analyzed using thematic analysis.	Both	Parents (mothers, n = 235 and fathers, n = 126) from 254 families.	Canada	Over half of the families in the sample reported changes to their eating habits and meal routines with some of those changes likely leading to improved diet quality, such as eating more meals from scratch, while others would be expected to lead to lower quality diets, such as eating more snack foods. The majority of families also reported increased screen time and decreased physical activity sinc…	While some unhealthful behaviors appeared to have been exacerbated, other more healthful behaviors also emerged since COVID-19. Research is needed to determine the longer-term impact of the pandemic on behaviors and to identify effective strategies to support families in the post-COVID-19 context.
Ferrante, M. J., et al. (2021). Food acquisition and daily life for U.S. families with 4-to 8-year-old children during COVID-19: Findings from a nationally representative survey. International Journal of Environmental Research and Public Health, 18(4), 1–15. https://doi.org/10.3390/ijerph18041734	The study examined parent-reported impacts of COVID-19 on lifestyle (e.g., work, childcare, grocery shopping), as well as current family food acquisition and eating behaviors (e.g., cooking, restaurant use). Specifically, paremnts indicated how often they engaged in the following behaviors: getting physical exercise, spending time outdoors in nature, spending time on screens or devices (e.g., pho…	Online survey administered in October 2020. Descriptive statistics were calculated, incorporating sampling weights based on sociodemographics.	Quantitative	U.S. parents with 4-to 8-year-old children (n = 1000).	USA	In terms of COVID-19 impacts, parents reported increases in working from home, decreased work hours, and increased child care and instruction, with most children attending school or receiving care at home. Parents reported increased home cooking and online grocery shopping; only 33% reported increased take-out or delivery from restaurants. About half of parents reported that their child dined at …	These nationally-representative results illustrate possible longer-lasting shifts in family life, with the potential to impact health and well-being. Sociodemographic differences and research and policy implications are discussed.
Menon, L., et al. (2022). Transformation in culinary behaviour during the COVID-19 pandemic: In-depth interviews with food gatekeepers in urban India. Appetite, 172, 105948. https://doi.org/10.1016/j.appet.2022.105948	The aim of this qualitative study was to explore the views of Indian household food gatekeepers towards meal planning, food purchasing, and meal preparation during the pandemic and its associated lockdowns.	Qualitative research design informed by the social constructivism paradigm. Online interviews were conducted between March and June 2021. Underpinned by Template Analysis technique, transcribed data were analysed manually and using the NVivo software program. The interview structure guided the development of themes. The emerging themes included were: Increased household cooking; Involvement of ch…	Qualitative	A convenience sample of 34 female gatekeepers from the Mumbai metropolis.	Mumbai, India	1. Changes in cooking behaviours: Increased household cooking; Involvement of children and male members in food-related activities; Experimentation in the kitchen. 2. Changes in meal planning and food shopping behaviours: Adoption of meal planning skills; Increase in online food shopping; Bulk buying; Shortage of food items. 3. Changes in food choices and behaviours: Reduced consumption of outsid…	Overall, both healthy and unhealthy culinary behaviours were practised during the COVID-19 pandemic and its associated lockdowns. The sustainability of the healthy culinary behaviours practised during the pandemic need to be verified through a follow-up study after the end of COVID-19 crisis. Also, there is a need for further research and surveillance to strengthen understanding of sustainability…
Philippe, K., et al. (2021). Child eating behaviors, parental feeding practices and food shopping motivations during the COVID-19 lockdown in France: (How) did they change? Appetite, 161. https://doi.org/10.1016/j.appet.2021.105132	The study evaluated possible changes in child eating behaviors, parental feeding practices, and parental motivations when buying food during the lockdown, compared to the period before the lockdown.	Online survey with items from validated questionnaires (e.g., CEDQ, CEBQ, HomeSTEAD). Parents reported on their (child's) current situation during the lockdown, and retrospectively on the period before the lockdown.	Quantitative	Parents of 498 children aged 3–12 years (238 boys; M = 7.32; SD = 2.27).	France	Many parents reported changes in child eating behaviors, feeding practices, and food shopping motivations. When changes occurred, child appetite, food enjoyment, food responsiveness and emotional overeating significantly increased during the lockdown. Increased child boredom significantly predicted increased food responsiveness, emotional overeating and snack frequency in between meals. When pare…	This study provides insights in factors that can induce positive and negative changes in families' eating, feeding and cooking behaviors. This can stimulate future studies and interventions.
Philippe, K., et al. (2022). Contrasts and ambivalences in French parents’ experiences regarding changes in eating and cooking behaviours during the COVID-19 lockdown. Food Quality and Preference, 96. https://doi.org/10.1016/j.foodqual.2021.104386	﻿Using open-ended questions, this study explored parents’ experiences regarding changes in their family's food-related behaviours during the first COVID-19 lockdown in France (March-May 2020).	Cross-sectional survey using thematic analysis. Parents described which food-related changes they (1) perceived as positive during the lockdown, (2) perceived as negative, and (3) would like to maintain after the lockdown.	Qualitative	Parents (N = 498, 72% mothers) of children aged 3–12 years.	France	Almost 90% of parents described a multitude of changes they perceived as positive during the lockdown. The most frequently mentioned themes were related to time, food choice, food preparation, sociability and commensality, food pleasure, emotions/meal atmosphere, and education/transmission. Negative food-related experiences included increased choice/overconsumption of palatable foods, weight conc…	This study revealed intimate perceptions of the impact of the lockdown on eating habits in families. They give insight into possible facilitators and barriers (e.g., time) for the adoption of recommended eating and cooking behaviours in families, beyond the pandemic.
Sylvetsky, A., et al. (2022). Impacts of the COVID-19 Pandemic on Children’s Sugary Drink Consumption: A Qualitative Study. Frontiers in Nutrition, 9, 860259. https://doi.org/10.3389/fnut.2022.860259	The study aimed to investigate effects of the pandemic on children's SD consumption and related dietary behaviors (questions about how the COVID-19 pandemic impacted the child’s SD intake and eating behaviors, and if parental oversight of the child’s SD intake had changed during the pandemic).	In-depth qualitative interviews were recorded, transcribed verbatim, and independently coded by two coders, after which, emergent themes and subthemes were identified and representative quotations selected.	Qualitative	Children 8-14 years old and their parent (n = 19 dyads).	USA	Although increases in children's SD and snack intake were almost unanimously reported by both children and their parents, increased frequency of cooking at home and preparation of healthier meals were also described. Key reasons for children's higher SD and snack intake were having unlimited access to SDs and snacks and experiencing boredom while at home. Parents also explained that the pandemic …	The results call attention to concerning increases in children's SD and snack intake during the COVID-19 pandemic. Intervention strategies to improve the home food environment, including reducing the availability of SDs and energy-dense snacks and providing education on non-food related coping strategies are needed.
Spyreli, E., et al. (2021). A qualitative exploration of the impact of COVID-19 on food decisions of economically disadvantaged families in Northern Ireland. BMC Public Health, 21(1), 2291. https://doi.org/10.1186/s12889-021-12307-1	The study aimed to explore how the measures to control the spread of COVID-19 influenced the food-related decisions of socioeconomically deprived families in Northern Ireland.	A qualitative study captured data from online individual interviews. Data were collected by using the methods of Photovoice and mapping exercise. Data were analysed through a thematic approach.	Qualitative	Participation was open for parents of children 2–17 years old living on a tight budget in urban and rural areas of Northern Ireland. A sampling matrix enabled equal representation of single- and two-parent households, as well as parents of younger children (<12y) and adolescents (≥12y).	Northern Ireland	Twelve online interviews were conducted and five distinct themes were identified reflecting families’ food-related decisions that were affected by the COVID-19 lockdown: 1) food planning; 2) food purchasing; 3) meal preparation; 4) eating and feeding behaviours and 5) eating food prepared outside the house.	The restrictions put in place to inhibit the spread of COVID-19 influenced all aspects of dietary decisions of low-income families. Changes observed during this period included frequent consumption of homemade meals, but also increased unhealthy snacking. Infrequent food shopping encouraged good meal planning, but was also a barrier to securing adequate fresh food. Food-related support including …
Nanayakkara, J., et al. (2022). Australian parents’ and children’s food-related interactions during the COVID-19 pandemic. British Food Journal. https://doi.org/10.1108/BFJ-12-2021-1291	The study aimed to explore parents' perceptions of their involvement and enjoyment in food-related interactions with their children during coronavirus disease 2019 (COVID-19)-associated lockdowns/restrictions and changes in their children's food intake, especially children's lunches during the remote learning period.	Data from parents (n = 136) were collected via an online survey in 2020. Parents' responses to closed-ended questions were analysed via descriptive statistics and open-ended responses were analysed thematically.	Both	Sample of Australian parents (n=136).	Australia	Most parents (62%) reported that they interacted more with their school-aged (5–17 years) children about food during COVID-19 compared to pre-pandemic times. These interactions included cooking, menu planning, eating, conversations around food, and gardening. Most parents (74%) prepared meals with their children during the pandemic and most of them (89%) reported that they enjoyed it. Most parent…	This study sheds important insights into a sample of Australian parents’ food-related interactions with their school-aged children during the COVID-19 pandemic and associated lockdowns and parents’ observations and perceptions of changes in the children’s food intake during the remote learning period.
Radwan, A., et al. (2021). Eating habits among primary and secondary school students in the Gaza Strip, Palestine: A cross-sectional study during the COVID-19 pandemic. Appetite, 163. https://doi.org/10.1016/j.appet.2021.105222	The study aims to identify the influence of COVID-19 on the eating habits, quality and quantity of food intake among school students in the Gaza Strip, Palestine.	A cross-sectional study was carried out among 2398 primary and secondary school students aged 6–18 year old through an online questionnaire which included questions on socio-demographic, eating habits as well as quality and quantity of food intake. Students over the age of 11 years completed the questionnaire on their own, whereas for students under the age of 12 years, the students' guardians we…	Quantitative	2398 primary and secondary school students aged 6–18 year old.	Gaza Strip, Palestine	During the COVID-19 pandemic, there was a significant increase in eating home-cooked foods (91.6%), avoiding ordering food from outside per week (93.3%) and buying groceries online (7.7%) (p < 0.001). There was a marked increase in the students reporting fear about food hygiene outside the home from 20.8% before COVID-19 to 72.9% during the COVID-19 period (p < 0.001). The results showed that the…	Eating habits have significantly altered among school students during the COVID-19 pandemic. In spite of some good healthy habits enhanced among students, the quantity and the quality of the food was compromised. Therefore, the responsible officials at the Ministry of Education must focus on enhancing school students' awareness towards increased intake of healthy food and adopting good eating hab…
Jansen, E., et al. (2021). Parental stress, food parenting practices and child snack intake during the COVID-19 pandemic. Appetite, 161, 105119. https://doi.org/10.1016/j.appet.2021.105119	The study aimed to investigate the impact of pandemic-associated stress on food parenting practices including interactions surrounding snacks, and child diet.	Parents completed a cross-sectional online survey assessing current COVID-19-specific stress, pre-COVID-19 stress, financial stress (e.g. food insecurity), food parenting practices, and child snack intake frequency. Structural Equation Modeling was used to model simultaneous paths of relationships and test direct and indirect effects.	Quantitative	Parents (N = 318) of 2–12-year old children	USA	Stress, including financial hardship, was higher compared with before the crisis. The majority of children had regular mealtimes and irregular snack times. Higher COVID-19-specific stress was associated with more non-nutritive use of food and snacks (e.g. emotional and instrumental feeding), but also more structure and positive interactions (e.g. eating with or engaging with child around mealtime…	Findings indicate that stress associated with the COVID-19 pandemic may be linked to child snack intake with potential impacts on child obesity risk, and suggest several modifiable points of intervention within the family context.
Dou, Z., et al. (2021). Household Food Dynamics and Food System Resilience Amid the COVID-19 Pandemic: A Cross-National Comparison of China and the United States. Front. Sustain. Food Syst., 4:577153. doi: 10.3389/fsufs.2020.577153	The study examined in real time how the COVID-19 pandemic impacted food-centric matters in 1,732 Chinese and 1,547 U.S. households during the stay-at-home directives.	Crossnational survey-based study	Quantitative	1,732 Chinese and 1,547 U.S. households	China; USA	Both cohorts reported increased efficiency in the use of food, families spending more time cooking and eating together, and more prudent use of food with less waste. Food purchasing patterns shifted from frequent trips to the store to dramatic increases in online ordering. A small proportion (2% U.S. and 11% Chinese respondents) reported clinically significant weight gains of >4.5 kg. Household f…	This study offers insights into food system resilience when facing the pandemic and sheds light on future food patterns as well as long-term questions for additional research about how people make decisions and food behavioral changes at times of crisis.
Farello, G., et al. (2022). Children and Adolescents Dietary Habits and Lifestyle Changes during COVID-19 Lockdown in Italy. Nutrients, 14(10):2135. https://doi.org/10.3390/nu14102135	The aim of this study was to describe changes in eating habits, the home food environment, parent feeding practices, physical activities and sleeping behaviours of Italian children and adolescents during the COVID-19 lockdown in order to promote public health strategies to prevent impacts of the pandemic on children’s and adolescents’ health.	Cross-sectional study involving 965 parents who completed an online survey about dietary habits and lifestyle during the first lockdown in Italy (from 9 March 2020 to 18 May 2020). Findings were compared with the period before the pandemic.	Quantitative	Parents (or caregivers) with Italian residency and with children aged between 5 and 18 years.	Italy	The pandemic was associated with an increase in the consumption of high-calorie snack foods. The total amount of food in homes during lockdown compared with before the pandemic increased 50%. Relating to the parent-perceived child weight status, more parents reported obesity in their children after lockdown (+0.6% in the 5–11 age group and +0.2% in the 12–18 age group). Results also show a reduct…	The COVID-19 pandemic was associated with changes in the lifestyles of children and adolescents; this could cause an increase in the incidence of obesity and of cardiovascular and metabolic diseases in adulthood.
Adams, E.L., et al. (2020). Food insecurity, the home food environment, and parent feeding practices in the era of COVID-19. Obesity, 28:2056–63. doi: 10.1002/oby.22996	The study aimed to describe changes in families’ home food environment and parent feeding practices, from before to during the coronavirus disease 2019 (COVID-19) pandemic, and examine whether changes differed by food security status.	Parents completed a single online survey, reporting on food security, home food availability, and feeding practices both retrospectively (considering before COVID-19) and currently (during COVID-19). χ2 and univariate regressions examined associations by food security status.	Quantitative	Parents (N = 584) in the US.	USA	The percent of families reporting very low food security increased by 20% from before to during COVID-19 (P < 0.01). About one-third of families increased the amount of high-calorie snack foods, desserts/sweets, and fresh foods in their home; 47% increased nonperishable processed foods. Concern about child overweight increased during COVID-19, with a greater increase for food-insecure versus food…	During COVID-19, increases in very low food security and changes in the home food environment and parent feeding practices were observed. Results highlight the need to address negative impacts of COVID-19 on children’s obesity risk, particularly among those facing health disparities.
